# Supplementary material
Source: PubMed Central journal article supplement (PMC4293221)
Supplement: NIHMS636272-supplement-1.pdf [file NIHMS636272-supplement-1.pdf]

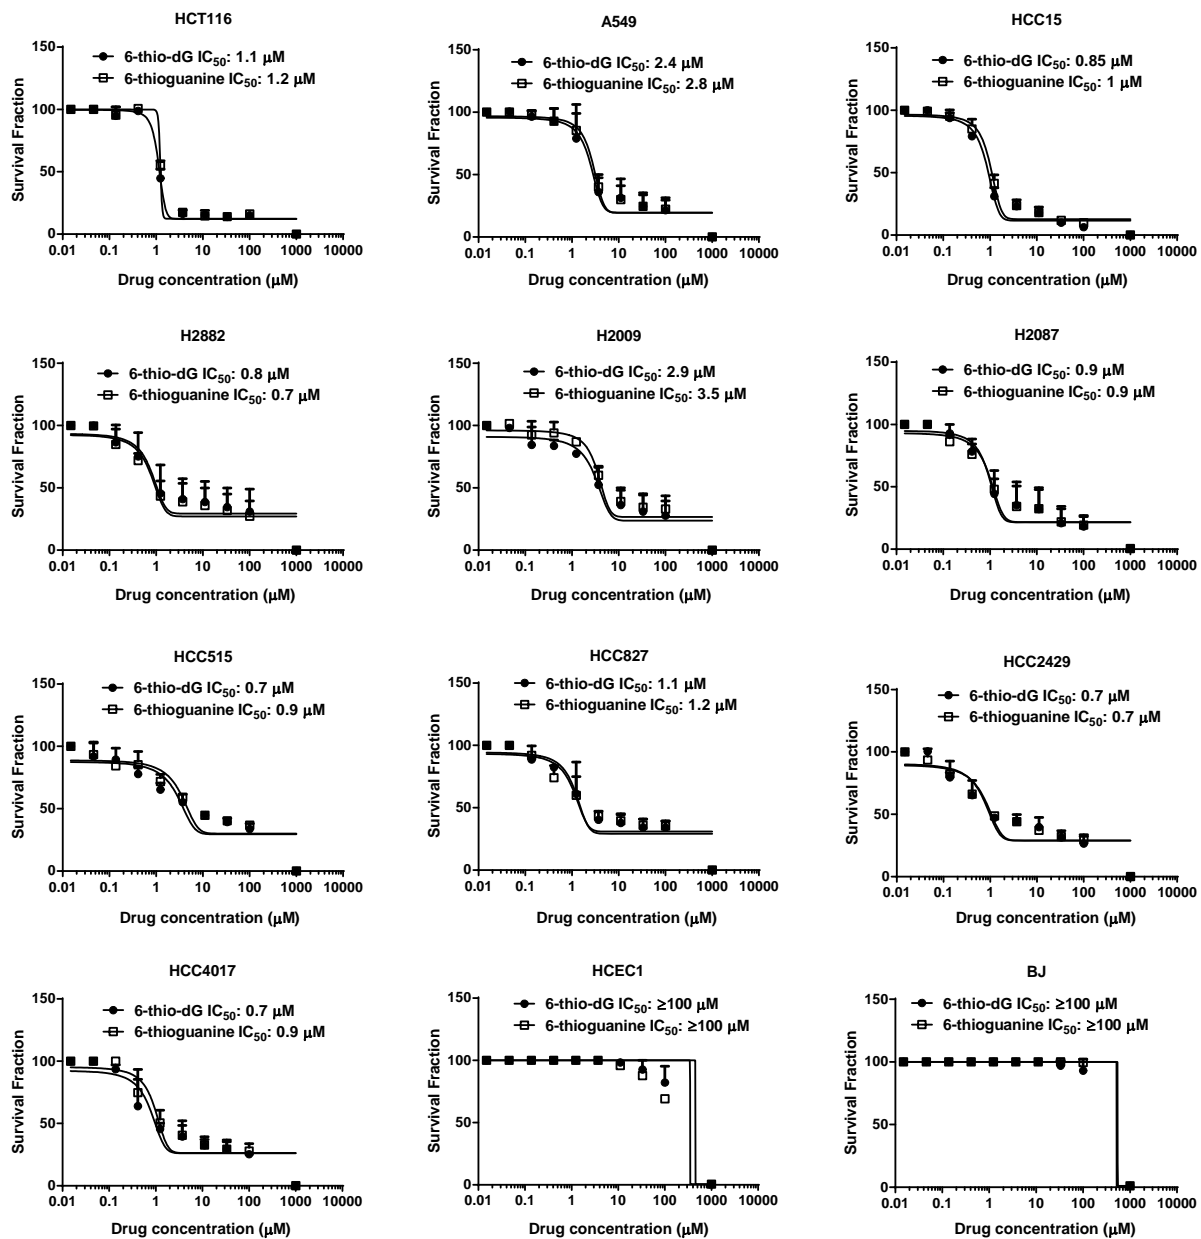

**Supplemental Figure S1.** Comparison of *in vitro* cell viability with 6-thio-dG and 6-thioguanine using the GLO-titer assay with IC<sub>50</sub> levels. All samples were analyzed in triplicate and SDs are from two independent experiments.
