# Supplementary material
Source: PubMed Central journal article supplement (PMC4293221)
Supplement: NIHMS636272-supplement-2.pdf [file NIHMS636272-supplement-2.pdf]

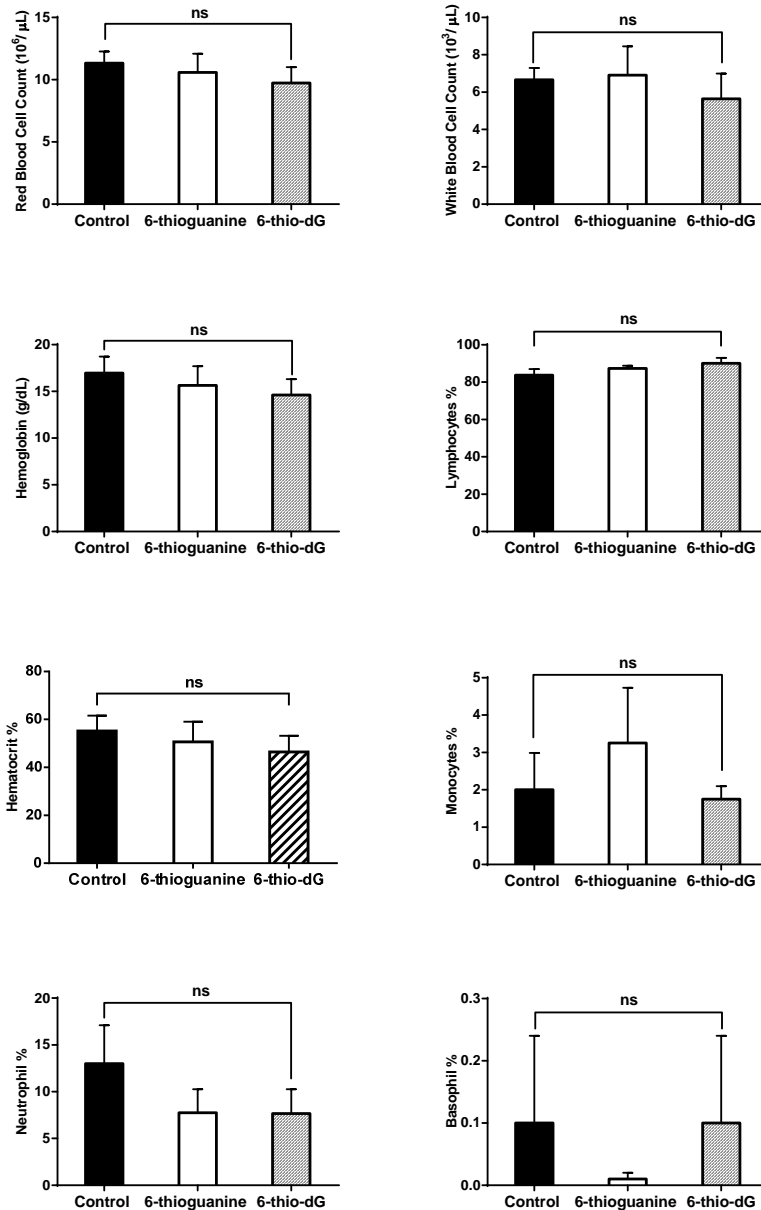

**Supplemental Figure S2.** Supplementary Hematological assays in wild type mice treated with 6-thio-dG and 6-thioguanine compared to control. 2 mg/kg 6-thio-dG or 6-thioguanine was injected (intraperitoneally) every two days for 14 days. Two days after the last injection, mice were sacrificed, whole blood was collected and red blood cell (RBC), white blood cell counts (WBC), hemoglobin (HGB), differential lymphocytes, hematocrit (HCT), monocytes, neutrophils, and basophils were evaluated. Differences between control:6-thioguanine and control:6-thio-dG are statistically non significant (ns).
