# Supplementary material
Source: PubMed Central journal article supplement (PMC4293221)
Supplement: NIHMS636272-supplement-3.pdf [file NIHMS636272-supplement-3.pdf]

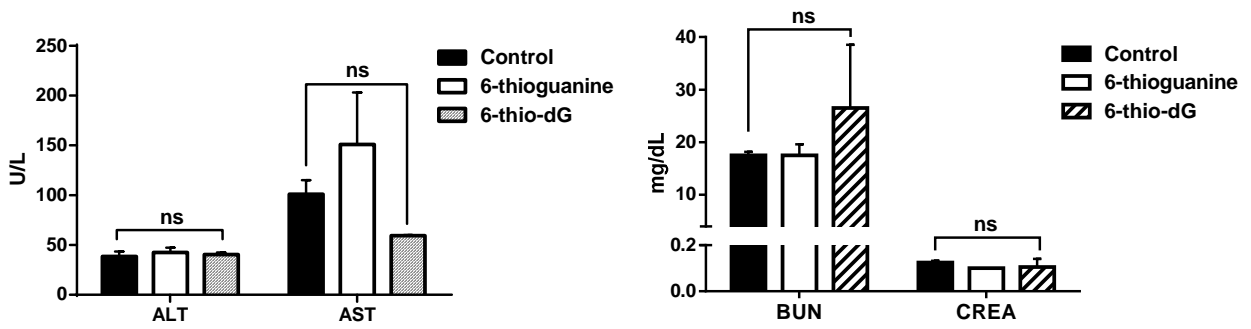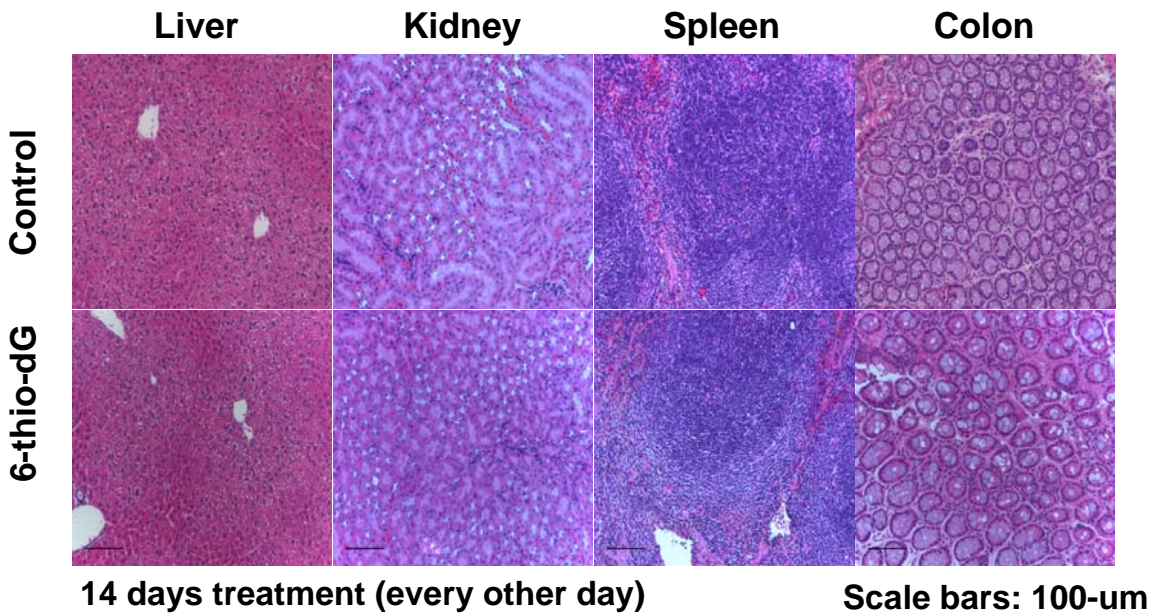

**Supplemental Figure S3.** Liver and renal function analysis and liver, kidney, spleen and colon histology in wildtype mice treated with 6-thio-dG and 6-thioguanine compared to control. 2mg/kg 6-thio-dG or 6-thioguanine was injected (intraperitoneally) every two days for 14 days. Alanine transaminase (ALT)/aspartate and transaminase (AST) were evaluated for liver function. Creatinine (CREA)/urea nitrogen (BUN) were evaluated for renal function. The images show liver, kidney, spleen and colon histology with hematoxylin and eosin (Control: DMSO/PBS). Differences between control:6-thioguanine and control:6-thio-dG are statistically non significant (ns). Scale bars: 100-um.
