# Supplementary material
Source: PubMed Central journal article supplement (PMC4293221)
Supplement: NIHMS636272-supplement-4.pdf [file NIHMS636272-supplement-4.pdf]

## Ki67

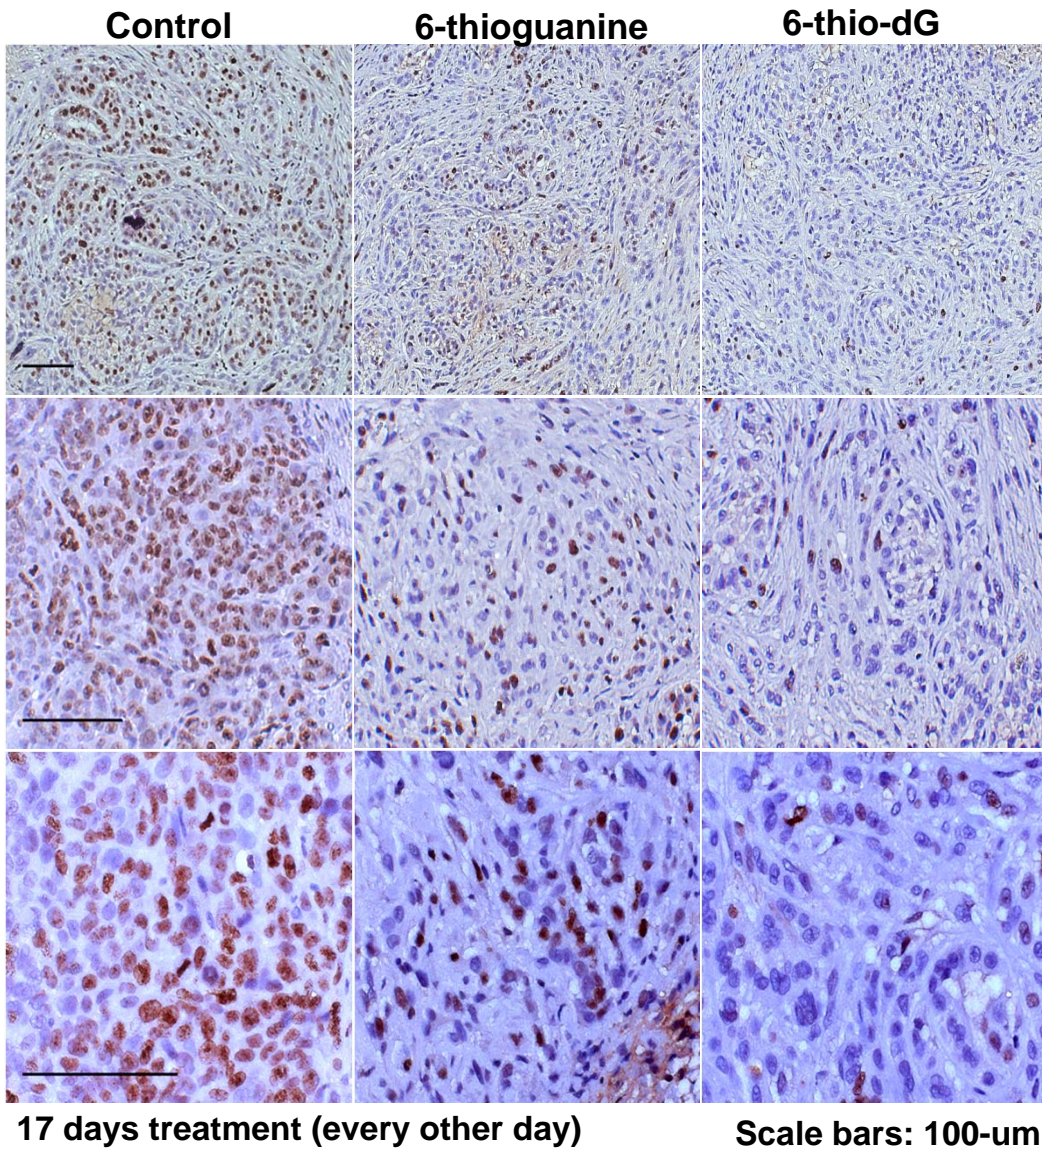

**Supplemental Figure S4.** Representative images of Ki67 expression in control, 6-thioguanine and 6-thio-dG treated A549 tumor after 2.0mg/kg 6-thio-dG or 6-thioguanine intraperitoneal injections for 17 days,. Magnifications 20x, 40x 63x, scale bars: 100- $\mu$ m.
