# Supplementary material
Source: PubMed Central journal article supplement (PMC4293221)
Supplement: NIHMS636272-supplement-5.pdf [file NIHMS636272-supplement-5.pdf]

| Cell Type | Telomere Length (kb) | 6-thio-dG ( $\mu\text{M}$ ) | 6-thioguanine ( $\mu\text{M}$ ) |
|-----------|----------------------|-----------------------------|---------------------------------|
| BJ        | 6 $\pm$ 0.35         | >100                        | >100                            |
| HCEC1     | 7.5 $\pm$ 0.5        | >100                        | >100                            |
| HCT116    | 7.7 $\pm$ 0.66       | 1.1                         | 1.2                             |
| A549      | 5.1 $\pm$ 2.85       | 2.4                         | 2.8                             |
| H2882     | 3.4 $\pm$ 0.08       | 0.8                         | 0.7                             |
| HCC2429   | 2 $\pm$ 0.1          | 0.7                         | 0.7                             |
| HCC827    | 1.6 $\pm$ 0.5        | 1.1                         | 1.2                             |
| HCC15     | 3.1 $\pm$ 0.36       | 0.85                        | 1.0                             |
| H2087     | 2.4 $\pm$ 0.004      | 0.9                         | 0.9                             |
| HCC4017   | 3.4 $\pm$ 0.58       | 0.7                         | 0.9                             |
| HCC515    | 3 $\pm$ 0.39         | 0.7                         | 0.9                             |
| H2009     | 8.4 $\pm$ 0.54       | 2.9                         | 3.5                             |

**Supplemental Table 1.** Average telomere length (kb) of cell lines and comparison of 6-thio-dG and 6-thioguanine on cell viability *in vitro* using GLO-titer assay with IC50 levels ( $\mu\text{M}$ ).
